# Supplementary material for: Localized shear and distributed strain accumulation as competing shear accommodation mechanisms in crustal shear zones: constraining their dictating factors
Source: Copernicus journal article supplement (doi:10.5194/se-15-1281-2024), 2024-10-29
Supplement: Supplementary file 1 [file se-15-1281-2024-supplement.zip]

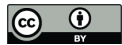

## *Supplement of*

# **Localized shear and distributed strain accumulation as competing shear accommodation mechanisms in crustal shear zones: constraining their dictating factors**

**Pramit Chatterjee et al.**

*Correspondence to:* Nibir Mandal ([nibir.mandal@jadavpuruniversity.in](mailto:nibir.mandal@jadavpuruniversity.in))

- [se-15-1281-2024-supplement-title-page.pdf](#)
- [Supplement.pdf](#)
- [Supplimentary video 1.mp4](#)
- [Supplimentary video 2.mp4](#)
- [Supplimentary video 3.mp4](#)

The copyright of individual parts of the supplement might differ from the article licence.
